# Supplementary material for: Ultrafine MoO3 nanoparticles embedded in porous carbon nanofibers as anodes for high-performance lithium-ion batteries
Source: Royal Society of Chemistry journal article supplement (doi:10.1039/c8qm00497h), 2018-11-02
Supplement: c8qm00497h1.pdf [file c8qm00497h1.pdf]

## Supporting Information

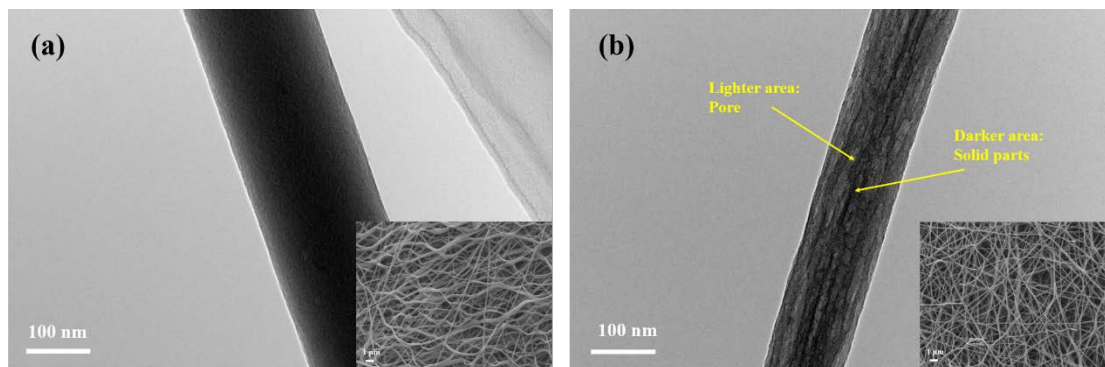

**Fig. S1** (a) TEM and SEM (inset) images of neat non-porous carbon nanofibers (CNFs); and (b) TEM and SEM (inset) images of porous carbon nanofibers (PCNFs) after carbonization at 750 C for 2 h.

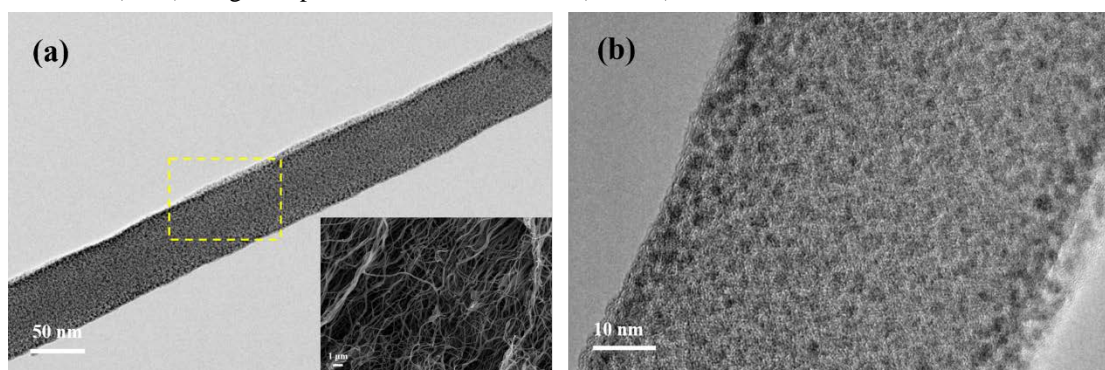

**Fig. S2** (a) TEM and SEM (inset) images of 0.5-MoO<sub>3</sub>/CNFs and (b) HRTEM images of 0.5-MoO<sub>3</sub>/CNFs.

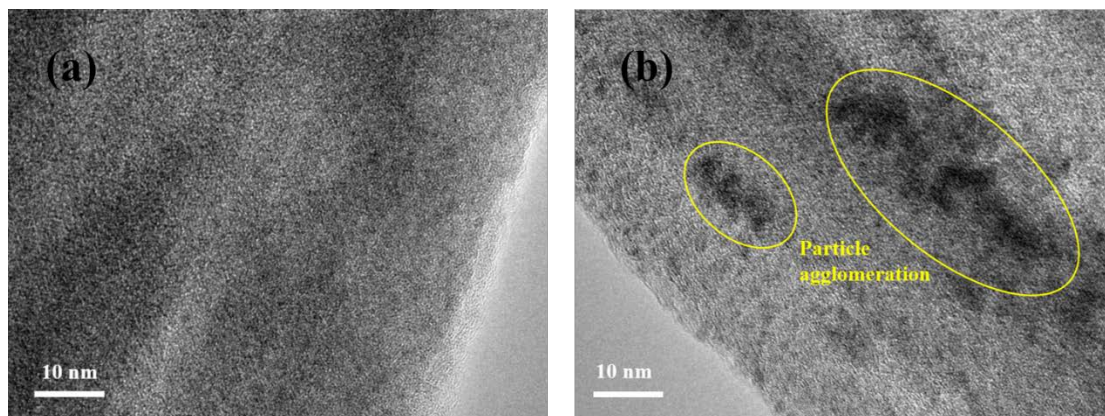

**Fig. S3** (a) TEM images of 0.25-MoO<sub>3</sub>/PCNFs and (b) 0.75-MoO<sub>3</sub>/PCNFs.

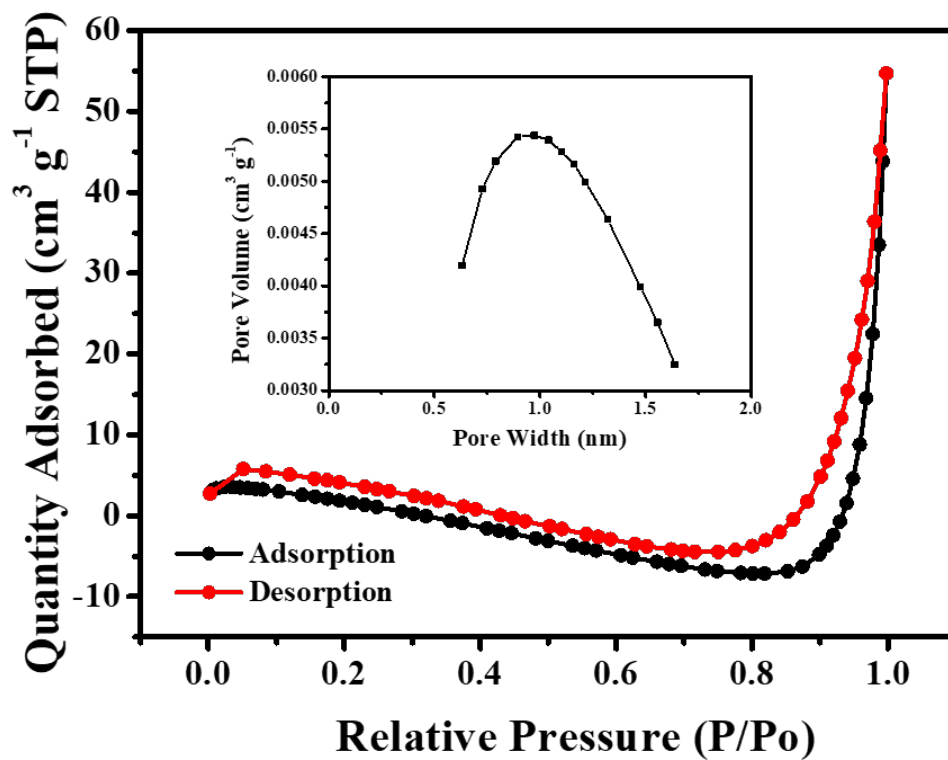

Fig. S4 Nitrogen adsorption–desorption isotherms and the pore size distribution of 0.5-MoO<sub>3</sub>/PCNFs.

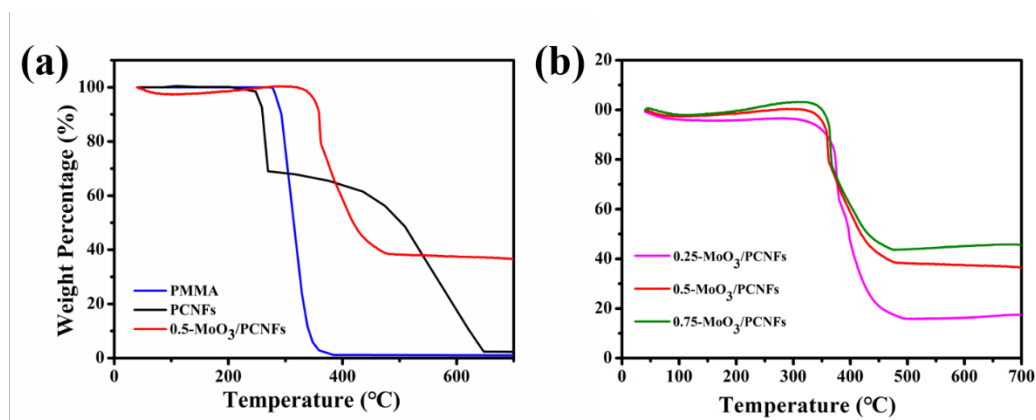

Fig. S5 TG patterns of (a) PMMA particles, PCNFs, 0.5-MoO<sub>3</sub>/PCNFs and (b) MoO<sub>3</sub>/PCNFs composite

according to different precursor content.

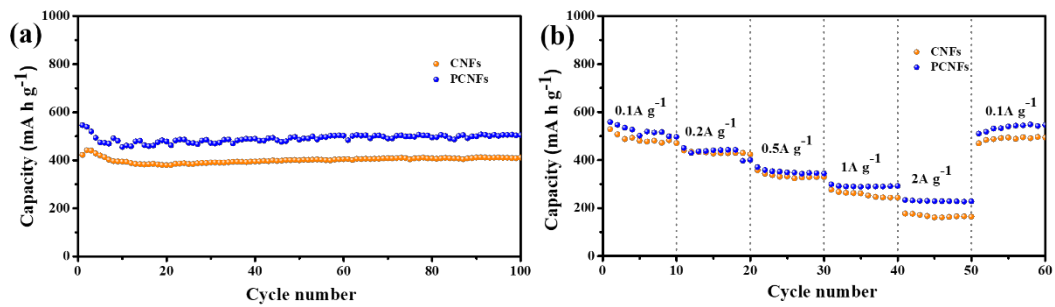

**Fig. S6** cyclic performance at a current density of 0.2 A g<sup>-1</sup> and (b) rate performance of 0.5-MoO<sub>3</sub>/PCNFs and 0.5-MoO<sub>3</sub>/CNFs electrodes.

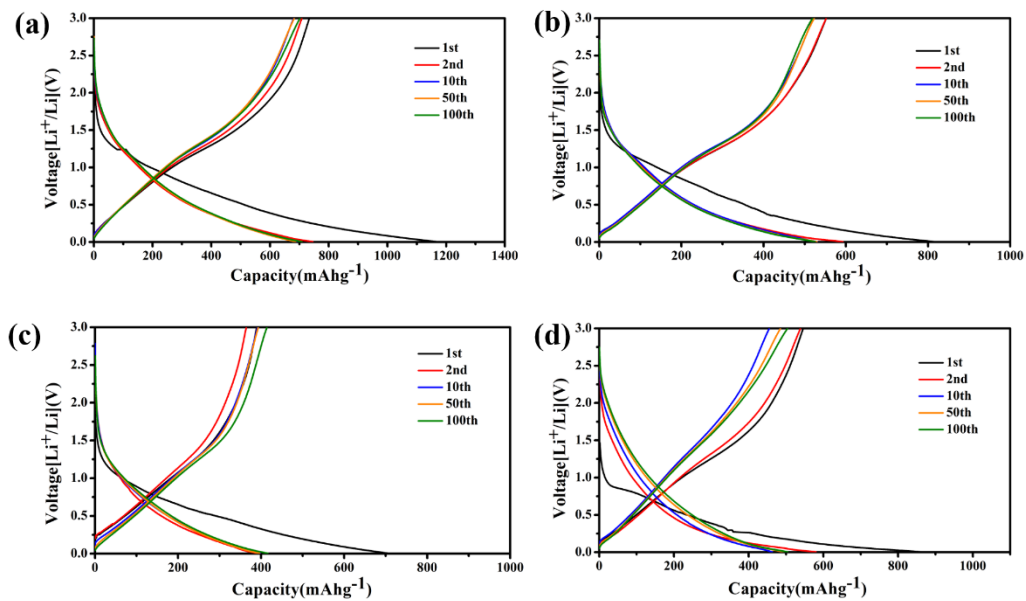

**Fig. S7** Charge/discharge profiles of the (a) 0.25-MoO<sub>3</sub>/PCNFs; (b) 0.75-MoO<sub>3</sub>/PCNFs (c) 0.5-MoO<sub>3</sub>/CNFs (d) PCNFs.

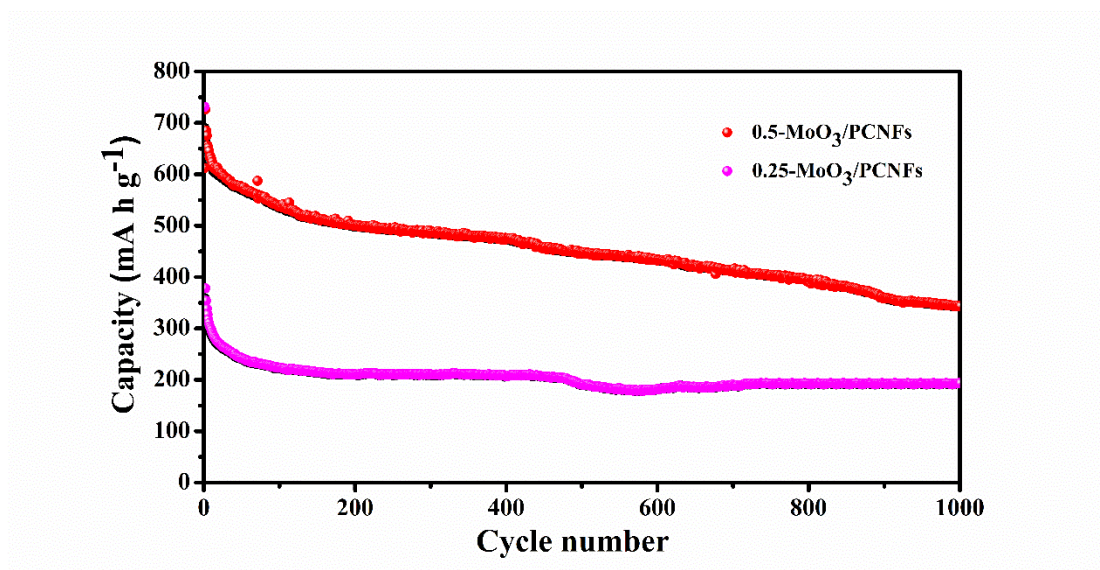

Fig. S8 cyclic performance at a current density of 1 A g<sup>-1</sup> of 0.5-MoO<sub>3</sub>/PCNFs and 0.25-MoO<sub>3</sub>/PCNFs electrodes.

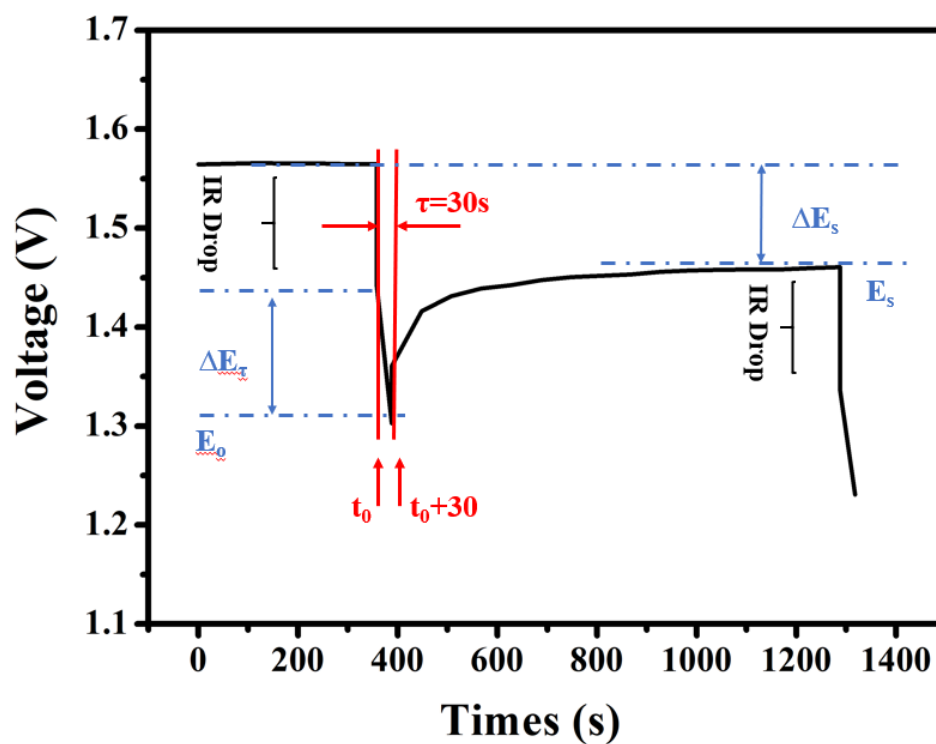

Fig. S9 E vs. t curves of 0.5-MoO<sub>3</sub>/PCNFs electrode for a single GITT during discharge process.

By applying a constant discharge current of 100 mA g<sup>-1</sup> for a limited period of time  $\tau$ , which is 30 seconds, the voltage of the battery at the equilibrium potential (E<sub>0</sub>) will decrease to a new

value due to the change in lithium content. The battery is then held at the open circuit voltage (OCV) for 15 minutes to reach a new steady state potential ( $E_s$ ), which is determined by Fick's second law of diffusion and is calculated based on Equation 1. (S1) is as follows<sup>1</sup>:

$$D = \frac{4l^2}{\pi t} \left( \frac{\Delta E_s}{\Delta E_\tau} \right)^2 \quad (\text{S1})$$

Where  $\tau$  is the duration of the current pulse (s), and  $\Delta E_s$  is the steady-state potential change (V) of the current pulse, which is the difference between  $E_o$  and  $E_s$ .  $\Delta E_\tau$  is a potential change (V) during the constant current pulse after the  $iR$  falls.  $l$  is the lithium ion diffusion length (cm); for a dense electrode, it is equal to the thickness of the electrode.

#### References

1. G Fang, Z Wu, J Zhou, C Zhu, X Cao, T Q Lin, Y M Chen, C Wang, A Q Pan, and S Q Liang, *Advanced Energy Materials*, 2018,1703155.
